1 **Growth orientations, rather than heterogeneous growth rates, dominate jaw**  
2 **joint morphogenesis in the larval zebrafish**

3 Josepha Godivier<sup>1</sup>, Elizabeth A. Lawrence<sup>2</sup>, Mengdi Wang<sup>2</sup>, Chrissy L. Hammond<sup>2</sup>, Niamh C.  
4 Nowlan<sup>1,3</sup>

5 <sup>1</sup> Imperial College London, London, United Kingdom, <sup>2</sup> University of Bristol, Bristol, United Kingdom, <sup>3</sup>  
6 University College Dublin, Dublin, Ireland

7 **Running title: Biofidelic simulation of jaw joint morphogenesis**

8 **Abstract**

9 In early limb embryogenesis, synovial joints acquire specific shapes which determine joint motion  
10 and function. The process by which the opposing cartilaginous joint surfaces are moulded into  
11 reciprocal and interlocking shapes, called joint morphogenesis, is one of the least understood aspect  
12 of joint formation and the cell-level dynamics underlying it are yet to be unravelled. In this research,  
13 we quantified key cellular dynamics involved in growth and morphogenesis of the zebrafish jaw joint  
14 and synthesised them in a predictive computational simulation of joint development. Cells in larval  
15 zebrafish jaw joints labelled with cartilage markers were tracked over a forty-eight hour time window  
16 using confocal imaging. Changes in distance and angle between adjacent cell centroids resulting from  
17 cell rearrangement, volume expansion and extracellular matrix (ECM) deposition were measured and  
18 used to calculate the rate and direction of local tissue deformations. We observed spatially and  
19 temporally heterogeneous growth patterns with marked anisotropy over the developmental period  
20 assessed. There was notably elevated growth at the level of the retroarticular process of the  
21 Meckel's cartilage, a feature known to undergo pronounced shape changes during zebrafish  
22 development. Analysis of cell dynamics indicated a dominant role for cell volume expansion in  
23 growth, with minor influences from ECM volume increases and cell intercalation. Cell proliferation in  
24 the joint was minimal over the timeframe of interest. Synthesising the dynamic cell data into a finite  
25 element model of jaw joint development resulted in accurate shape predictions. Our biofidelic  
26 computational simulation demonstrated that zebrafish jaw joint growth can be reasonably  
27 approximated based on cell positional information over time, where cell positional information  
28 derives mainly from cell orientation and cell volume expansion. By modifying the input parameters of  
29 the simulation, we were able to assess the relative contributions of heterogeneous growth rates and  
30 of growth orientation. The use of uniform rather than heterogeneous growth rates only minorly  
31 impacted the shape predictions whereas isotropic growth fields resulted in altered shape predictions.  
32 The simulation results suggest that growth anisotropy is the dominant influence on joint growth and

33 morphogenesis. This study addresses the gap of the cellular processes underlying joint  
34 morphogenesis, with implications for understanding the aetiology of developmental joint disorders  
35 such as developmental dysplasia of the hip and arthrogyrosis.

36 **Keywords:** computational simulation, finite element model, high resolution imaging, joint shape,  
37 skeletal development

38

## 39 Introduction

40 Synovial joints are complex structures connecting skeletal elements while allowing different types of  
41 motion. In early limb embryogenesis, the cartilaginous anlagen of the future skeletal elements are  
42 initially uninterrupted (Yang 2013). A zone of compact and interconnected cells, called the interzone,  
43 emerges marking the location of the future joint. Physical separation of the skeletal elements occurs  
44 by cavitation of the interzone while the two opposing surfaces mould into reciprocal and interlocking  
45 shapes in a process known as joint morphogenesis (Pacifici et al. 2005, Chijimatsu and Saito 2019,  
46 Rux et al. 2019). A variety of distinct and complex joint shapes, which are specific to anatomical sites  
47 and allow distinct motions, emerge from this process; examples of joint diversity are the hinge joint  
48 of the knee and the ball and socket of the hip. This process by which joints acquire their shapes has  
49 important ramifications for joint health and function. For example, sub-optimal hip joint shape is  
50 believed to be a key risk factor in early onset osteoarthritis (Sandell 2012, Faber et al. 2020).  
51 However, the mechanisms underlying the emergence of joint shape remain poorly understood.

52 A small number of studies have identified cell activities involved in joint growth and morphogenesis.  
53 Work on embryonic murine synovial joints have shown that a continuous influx of pro-chondrogenic  
54 cells contributes to joint morphogenesis (Shwartz et al. 2016), with evidence that asymmetric influx  
55 and proliferation of these cells enables the emergence of asymmetric shape features (Zhang et al.  
56 2020). The maintenance of cell fate has also been shown to be essential for joint cavitation and  
57 morphogenesis. Absent muscle contraction results in premature differentiation of joint pro-  
58 chondrocytes with consequences for joint shape in the embryonic murine elbow (Kahn et al. 2009).  
59 The roles of cell size, orientation and intercalation in developing zebrafish and murine joints have  
60 been identified (Shwartz et al. 2012, Brunt et al. 2015) and differential cell volume expansion and cell  
61 rearrangements were shown to be key factors for thickening and organisation in postnatal murine  
62 articular cartilage (Decker et al. 2017). Cell proliferation and cell death do not majorly impact  
63 morphogenesis in postnatal murine articular cartilage (Decker et al. 2017). These observations  
64 provide insights on the cellular dynamics underlying joint morphogenesis, but there is a lack of  
65 understanding of the contribution of each of these processes to joint growth and morphogenesis.  
66 The research question we tackle in this paper is how a complex range of dynamic cellular activities  
67 combine to enable the formation of specific shape features in synovial joints.

68 Computational models enable the synthesis of experimental data and a means to test hypotheses via  
69 simulation. In previous work from our group, (Giorgi et al. 2014), the emergence of different joint  
70 shapes based on types of simulated fetal movements was predicted in a mechanobiological  
71 simulation. A simulation of hip joint development revealed how asymmetric movements can result in

72 altered shapes resembling those seen in developmental dysplasia of the hip (Giorgi et al. 2015). A  
73 later simulation using aspects of the same model from another group investigated the impact of  
74 muscle mass and anatomy on development of the glenohumeral joint and was able to predict the  
75 formation of brachial plexus birth injury (Dixit et al. 2020). The limitation of most simulations of joint  
76 morphogenesis is that they are based on simplified or extrapolated cell activities. Our simulations  
77 and those of others (Shefelbine and Carter 2004, Giorgi et al. 2014, Dixit et al. 2020) have modelled  
78 the biological contribution to growth as being proportional to chondrocyte density, based on a study  
79 by Heegaard et al. (1999), in which chondrocyte density was approximated based on the grey level  
80 distribution of a section of a human interphalangeal joint. As cellular processes orchestrate any  
81 changes in joint shape, the lack of a more precise and specific characterisation of cell-level activities  
82 to joint growth and morphogenesis is a striking gap. Simulations of joint growth and morphogenesis  
83 based upon accurately tracked cell activities will provide insights into the mechanisms underlying  
84 prenatal joint growth and morphogenesis.

85 There is a growing body of research on quantifying cellular dynamics involved in growth and  
86 morphogenesis using computational tools. Rubin et al. (2021) built 3D maps of cell morphologies  
87 from light-sheet images of the embryonic murine tibia. Cell density, surface area, volume and  
88 orientation were quantified and spatially analysed revealing that differential cell volume expansion  
89 underlies tissue morphogenesis of the developing growth plates. Stern et al. (2021) quantified cell  
90 dynamic behaviours, such as proliferation and intercalation, in the epithelial sheet of the *Drosophila*  
91 embryo and evaluated their impact on gastrulation in terms of area expansion and tissue stretching.  
92 Heller et al. (2016) developed an automated image analysis toolkit for epithelial tissues called  
93 EpiTools which enables spatial and temporal morphometric analysis of time lapse images taken at  
94 high temporal and cellular resolution—namely cell surface area, shape, division, orientation and  
95 intercalation. Applied to *Drosophila* wing imaginal disc, this toolkit provided new understanding of  
96 the role of cell rearrangements underlying tissue growth and morphogenesis. Others have been able  
97 to directly quantify tissue growth based on cell level data using lineage tracing (Marcon et al. 2011,  
98 Morishita et al. 2015, Suzuki and Morishita 2017, Tozluoglu et al. 2019). Quantitative maps of tissue  
99 deformation coupling growth rates and anisotropy were obtained in developing chick limbs (Marcon  
100 et al. 2011, Morishita et al. 2015, Suzuki and Morishita 2017) and in the *Drosophila* wing disc  
101 (Tozluoglu et al. 2019). These studies showed that spatially and temporally heterogenous growth  
102 patterns as well as growth anisotropy are key drivers of morphogenesis, while uniform growth rates  
103 do not lead to correct shape predictions. We are not aware of any similar studies quantifying the  
104 cellular dynamics of joint morphogenesis. Such characterisation combined with computational  
105 simulation of joint growth will help us to unravel different contributions to joint morphogenesis,

106 including the roles of cell volume changes and rearrangements as previously highlighted in other  
107 growing tissues.

108 In this research, we quantify the cell-level dynamics during joint morphogenesis by tracking cell  
109 activities in high resolution in larval zebrafish jaws, then synthesise them in a predictive  
110 computational simulation of joint development. We use the simulation to test if growth  
111 heterogeneity or growth orientation are the dominant influences on joint growth and  
112 morphogenesis. This paper addresses the gap in knowledge on the cellular processes and dynamics  
113 leading to morphogenesis of developing joints.

## 114 Methods

### 115 Zebrafish husbandry/Zebrafish lines

116 Fish were maintained as described in Aleström (2020). All experiments were approved by the local  
117 ethics committee (Bristol AWERB) and performed under a UK Home Office Project Licence.  
118 Transgenic lines *Tg(col2a1aBAC:mCherry)* (Mitchell et al. 2013) and *Tg(-4.9sox10:eGFP)* (Carney et al.  
119 2006) have been previously described.

### 120 CHARACTERISING GROWTH FROM CELL-LEVEL DATA IN ZEBRAFISH JAW JOINTS

#### 121 Zebrafish jaw joint live imaging

122 Ten jaw joints from double transgenic *Tg(col2a1aBAC:mCherry; -4.9sox10:eGFP)* larvae were imaged  
123 at 12-hour intervals from 3.5 to 5.5 days post fertilisation (dpf) using a Leica SP8 confocal microscope  
124 with a temperature-controlled chamber set to 28°C. Images centred on the joint line, as marked by a  
125 red box in Figure 1A, were acquired with a 20x HCX PL APO lens at a resolution of 512 x 512 px. Prior  
126 to imaging, larvae were anaesthetised in 0.1 mg ml<sup>-1</sup> tricaine methanesulphonate (MS222) and  
127 mounted in a ventral orientation in warm 1% low melting point (LMP) agarose. Following imaging,  
128 the larvae were flushed from the agarose using Danieau's buffer and kept in separate wells of a 24-  
129 well plate between imaging timepoints.

#### 130 Cell segmentation and tracking

131 Consecutive image stacks with *sox10:eGFP* chondrocyte marker were filtered in Fiji (Schindelin et al.  
132 2012). 3D Fast Filters-OpenGray, 3D Edge and Symmetry and 3D Morphological filters from the 3D  
133 ImageJ Suite plugin (Ollion et al. 2013) were applied in this order with the parameters supplied in  
134 Table 1. Once filtered, morphological segmentation followed by Inertia Ellipsoid filtering using Fiji's  
135 MorpholibJ plugin (Legland et al. 2016) were performed to extract the 3D cell centroids' coordinates  
136 in the joint at each timepoint. Segmentation results were then cleaned and used to manually track  
137 joint cells between images from two consecutive timepoints using manual labelling in MATLAB  
138 (R2018a, The MathWorks, Inc., Natick, Massachusetts, United States). Cells in which  
139 *col2a1aBAC:mCherry* cartilage marker expression was absent were considered part of the interzone  
140 and not tracked. Due to image resolution and segmentation quality some image stacks were  
141 discarded from the analysis, and the final sample numbers per timepoint are detailed in Figure 4. At  
142 each timepoint, cells in the joint were counted to assess proliferation, and the volume occupied by  
143 the tracked cells was calculated to assess cell volume expansion.

#### 144 Growth maps calculations

145 For each 12-hour interval time window (3.5–4, 4–4.5, 4.5–5 and 5–5.5), joint shapes were  
146 extracted from the consecutive image stacks with *col2a1:mcherry* chondrocyte marker in Mimics  
147 (Materialise NV, Leuven, Belgium) and aligned in 3-matic (Materialise NV, Leuven, Belgium). Any  
148 transformation which was applied to the joint shapes in 3-matic was consistently applied to the  
149 corresponding centroids in MATLAB. A cubic grid of side length fifteen microns was superimposed on  
150 the aligned joints to divide them into regions of interest (ROIs) as shown in Figure 1B. For each ROI,  
151 cells within the ROI's limits were detected and their adjoining cells were listed. Vectors linking the  
152 centroids of adjacent cells were created. In each of the ROIs, a “statistical velocity gradient” was  
153 calculated based on vector length and orientation variations between images from consecutive  
154 timepoints using the method described by Graner et al. (2008). This gradient quantifies local  
155 distortions and rearrangements, such that if cells within an ROI grow or intercalate, or if extracellular  
156 matrix is built, the distance between cell centroids, and therefore the geometry of the tissue, change.  
157 The statistical velocity gradient can be represented by an ellipsoid with orthogonal axes, as  
158 illustrated in Figure 1C. The orientation of the axes and their associated radii respectively correspond  
159 to the direction and rate of local tissue geometry deformation. Maps of local strain rates with the  
160 associated directions of deformation were generated from each of the three ellipsoid's axes as  
161 shown in Figure 1C. These maps are referred to hereafter as growth maps. For each time window,  
162 growth maps were calculated for each of the samples and then averaged. Within each ROI, strain  
163 rates that lay outside the interquartile range were removed from the averaging.

164 Raw, filtered, and segmented confocal image stacks, along with MATLAB codes for cell tracking and  
165 growth rate calculations are available at doi: 10.5281/zenodo.5769854.

## 166 **SIMULATING ZEBRAFISH JAW GROWTH WITH A FINITE ELEMENT MODEL**

### 167 **Shape generation**

168 Confocal image stacks of four to five larval zebrafish jaws (encapsulating the Meckel's cartilage, the  
169 palatoquadrate and the ceratohyal, see Figure 1A) from the transgenic line *Tg(col2a1aBAC:mCherry)*  
170 were taken with a Leica SP8 confocal microscope at the “endpoints” of each time window (3.5, 4, 4.5,  
171 5 and 5.5 dpf) using the methodology described above. A 3D Gaussian grey filter with isotropic radius  
172 3.0 pixels was applied to the image stacks in Fiji. These were imported in Mimics to be segmented  
173 and the resulting 3D surfaces were aligned. Only half-jaws (separated at the level of the midsagittal  
174 plane) were segmented, as shown in Figure 2A(i). The half-jaws were imported into MATLAB and  
175 were divided into slices in the transversal plane as shown in Figure 2A(i). For each slice, a shape  
176 outline was obtained for each specimen from the shape vertices and an average outline was  
177 generated as shown in Figure 2A(ii-iii). Averaged shape outlines were saved as image stacks and

178 imported into Mimics where the resultant average half-jaw shape was generated. Also in Mimics, the  
179 interzone was added as a volume filling the gap between the two joint elements using Boolean  
180 operations, with the interzone's external boundaries approximated based on imaging data (Brunt et  
181 al. 2016). Finally, a non-manifold assembly combining the half-jaw and the interzone was generated  
182 as shown in Figure 2B(i). In 3-matic, the non-manifold assembly was meshed with ten node  
183 tetrahedral elements and exported to Abaqus CAE (Dassault Systemes, 2019) where a model for each  
184 12-hour time window was created.

### 185 **Material properties and boundary conditions**

186 All cartilaginous regions (Meckel's cartilage (MC), palatoquadrate (PQ) and ceratohyal) were assigned  
187 homogeneous isotropic elastic material properties with Poisson's ratio 0.3 and Young's Modulus  
188 (YM) 54.8 kPa based on nanoindentation measurements taken on 5 dpf wild type zebrafish jaw joints  
189 (Lawrence et al. 2021). The interzone was assigned isotropic elastic material properties with  
190 Poisson's ratio 0.3 and YM set at 0.25% of the cartilaginous YM based on Brunt et al.'s original study  
191 where this ratio between the two YM was found to facilitate physiological jaw displacements when  
192 muscle loading was applied (Brunt et al. 2015). The ceratohyal does not form part of the region of  
193 the jaw joint of interest (see Figure 1), but was needed for coherent boundary conditions. The  
194 following boundary conditions were applied, as illustrated in Figure 2B(i): the anterior end of the  
195 ceratohyal was fixed in all directions, only anteroposterior translations of the posterior end of the  
196 ceratohyal were allowed and translations of the anterior end of the Meckel's cartilage in the  
197 lateromedial direction were prevented.

### 198 **Growth maps integration**

199 For each 12-hour period, strains derived from the growth maps were imported into Abaqus CAE as  
200 three distinct analytical mapped fields and applied to the model. The coordinates of the ROI centres  
201 were assigned the calculated strains and interpolation was performed between ROI centres to assign  
202 strains to each element lying within the ROIs' limits. Local material orientations matching the local  
203 directions for growth were assigned to the joint elements. Elements whose nodes' coordinates were  
204 contained within an ROI were all assigned the directions for growth of this ROI. Direction 1 is the  
205 main direction for growth (corresponding to the major axis of the statistical velocity gradient's  
206 ellipsoid), direction 2 is the second direction for growth (median axis) and direction 3 is the third  
207 direction for growth (minor axis). These directions differed from ROI to ROI. As an example, growth  
208 fields and their associated directions at the level of the joint for time window 4—4.5 are shown in  
209 Figure 2B(ii). MC and PQ hypertrophic regions were not visible in the cell tracking data, but were  
210 included in the FE model of the half-jaw. For these hypertrophic regions, growth rates were set to



211 the average of those of a 30  $\mu\text{m}$  depth of the adjacent proliferative cartilage. In the PQ hypertrophic  
212 cartilage, the material orientation of the adjacent proliferative region was used throughout. In the  
213 MC hypertrophic region, in which cell orientation varies along the length of the rudiment as shown in  
214 Figure 1A, the material orientation of the adjacent cartilage was rotated based on a linear regression  
215 of cell orientation with respect to distance from the joint line, fitted to discrete measurements taken  
216 in Fiji. The Abaqus user subroutine UEXPAN was used to apply spatially varying expansion based on  
217 the strain fields along the corresponding material orientations to provide a prediction of growth and  
218 shape for each time-window.

### 219 **Quantification of simulation performance**

220 The predicted shapes were imported into 3-matic where they were aligned with the average jaw  
221 shapes of each of the “endpoints” of each time window. Views in the lateral and the ventral planes  
222 were exported to Fiji where shape outlines were extracted, and the following shape features were  
223 measured: anterior Meckel’s cartilage (MC) length, depth and width and posterior palatoquadrate  
224 (PQ) length and depth, as shown in Figure 3. To assess the predictive quality of the simulation for  
225 each shape feature, a percentage match of change was calculated as a) the difference between the  
226 predicted shape measurement and the initial shape measurement divided by b) the difference  
227 between the target shape measurement and the initial shape measurement. The following scores  
228 were then assigned based on the percentage match:

- 229 - less than 10% match: no growth predicted
- 230 - between 10% and 70%: undergrowth
- 231 - between 70% and 130%: accurate growth
- 232 - above 130%: overgrowth

### 233 **Quantification of the relative roles of growth characteristics**

234 To quantify the relative importance of growth heterogeneity versus growth direction, simulations  
235 were conducted in which each of these features was removed or kept constant. Spatial growth  
236 heterogeneity was removed in both the MC and PQ by averaging the growth ellipsoids, within the set  
237 of ROIs in each rudiment, at each time window. In each rudiment, the average growth ellipsoid was  
238 used to generate homogeneous growth maps along the three directions for growth (corresponding  
239 to the ellipsoid’s axes) and applied to the model throughout the joint and hypertrophic regions.  
240 Orientation in the MC hypertrophic region was still adapted along its length. To remove the role of  
241 orientation, isotropic growth was used. Within each ROI in both the joint and hypertrophic regions,  
242 an average growth rate corresponding to the average of the three growth ellipsoids’ radii was  
243 obtained and applied to the ROI. In other words, ROIs growth ellipsoids became spheres. The

244 resultant shapes when either growth heterogeneity or growth direction were removed were  
245 compared to the “full” simulation and with each other.

246 MATLAB codes for shape averaging, Abaqus CAE models and real and predicted shapes are available  
247 at doi: [10.5281/zenodo.5769854](https://doi.org/10.5281/zenodo.5769854).

248

## 249 Results

### 250 Growth in the zebrafish jaw joint exhibits spatial and temporal heterogeneity as well as marked 251 anisotropy

252 Comparing shape feature measurements between 3.5 and 5.5 dpf revealed an overall volume  
253 expansion over time with a marked increase in Meckel's cartilage (MC) and palatoquadrate (PQ)  
254 length (Figure 3: diamond and triangle), a slight increase in MC and PQ depth (Figure 3: circle and  
255 semi-circle) and a slight contraction of MC width (Figure 3: square). In the anterior MC joint element,  
256 growth rates in the main direction for growth varied between time windows, ranging from  
257 contraction at a mean rate of  $-2.06 \pm 1.49 \times 10^{-2}$  per hour from 3.5–4 dpf, to expansion at a rate of  
258  $2.45 \pm 0.61 \times 10^{-2}$  per hour from 4.5–5 dpf, as shown in Table 2. In the posterior PQ joint element,  
259 growth rates in the main direction consistently increased from a mean rate of  $1.01 \pm 3.51 \times 10^{-2}$  per  
260 hour from 3.5–4 dpf to a mean rate of  $2.10 \pm 1.27 \times 10^{-2}$  per hour from 5–5.5 dpf, as shown in Table  
261 2. Elevated growth rates in the main direction were observed at the retroarticular process (the most  
262 ventroposterior area of the anterior MC joint element shown in Figure 1) from 4–4.5 and 4.5–5 dpf  
263 as shown in Figure 4A (black arrows). Growth rates along the second and third directions for growth  
264 were much lower than those of the main direction in both the MC and PQ, as shown in Table 2,  
265 demonstrating growth anisotropy. Growth maps in the second and third directions for growth are  
266 provided in Supplementary Figures 1 and 2. Growth orientations in the anterior MC element  
267 exhibited consistent alignment across ROIs; with time, the main direction shifted to align with the  
268 ventrodorsal axis from 4.5–5 and 5–5.5 dpf, as shown with solid black lines in Figure 4A. The main  
269 direction for growth in the posterior PQ element also tended to align with the ventrodorsal axis from  
270 4.5–5 and 5–5.5 dpf as shown with the black lines in Figure 4B. Overall, growth rates and  
271 orientations in the developing jaw joint changed over the time period studied in both joint elements  
272 and elevated growth rates were observed at the retroarticular process of the MC demonstrating  
273 spatial and temporal growth heterogeneity. Marked growth anisotropy was observed in both joint  
274 elements.

275 Manual assessment of tracked cells over the time window studied revealed very low proliferation  
276 rates in the joint. The percentage of cells which underwent division in the joint over twelve hours  
277 was  $2.42 \pm 1.73$  % in the MC and  $0.50 \pm 0.56$  % in the PQ, suggesting that proliferation would only  
278 minorly impact on joint growth. No intercalation of joint cells was observed over the twelve-hour  
279 timeframes during cell tracking (sample cell tracking over time shown in Figure 5). The volume  
280 occupied by tracked joint cells over the timeframe of interest increased substantially, with a mean  
281 relative volume expansion per twelve hour period of  $18.49 \pm 20.44$  % in the MC and  $23.68 \pm 23.92$  %

282 in the PQ. Because the ECM forms a thin layer between adjacent cells (see Figure 5), it could not be  
283 accurately segmented and its volume was not directly quantified. However, the interstitial space  
284 between adjacent cells was consistently narrow, with no apparent increase over time (see example in  
285 Figure 5). Therefore, our data indicate that increases in joint volume over the studied time window  
286 were primarily due to cell volume increases, rather than proliferation or increases in ECM volume.

### 287 **Cell positional information over time enables consistent prediction of zebrafish jaw morphogenesis**

288 Growth for each of the time windows was computationally simulated based on the calculated growth  
289 maps, and the shape features undergoing change between 3.5 and 5.5 dpf were used to assess the  
290 quality of the shape predictions. For each time window, most observed shape changes were  
291 predicted, either accurately, or with some under- or over-growth, as highlighted with green, yellow  
292 and purple (respectively) symbols in Figure 6. Length change in both rudiments was accurate from  
293 4–4.5 and 5–5.5 dpf (green triangles and diamonds in Figure 6B & D) but undergrowth was  
294 observed from 3.5–4 and 4.5–5 dpf (yellow triangle and diamond in Figure 6A & C). The change of  
295 depth in the lateral plane in both rudiments was mostly predicted (yellow and purple circles and  
296 semi-circles in Figure 6A, C & D) though only the 4–4.5 predictions accurately matched the target  
297 shape (green circle in Figure 6B). The decrease of MC width observed from 3.5–4 and 4.5–5 dpf in  
298 the ventral plane was not replicated in the predicted shapes (red squares, Figure 6A & C). Overall, the  
299 shape predictions were close to their target shapes (Figure 6). Therefore, zebrafish jaw joint growth  
300 and shape change for the time window modelled can be reasonably approximated based on cell  
301 positional information over time, where that cell positional information derives mainly from cell  
302 rearrangements and volume expansion.

### 303 **Growth orientation is more important for zebrafish jaw joint shaping than growth heterogeneity**

304 The importance of growth heterogeneity and direction was assessed in simulations in which each of  
305 these features was either removed or kept constant. Removing growth heterogeneity resulted in  
306 only minor shape changes: over the four time-windows, two features exhibited undergrowth  
307 compared to the “full” simulations (PQ length from 3.5–4 dpf and MC depth from 5–5.5 dpf as  
308 shown in Figure 7A). In contrast, when growth orientation was removed, several shape features were  
309 markedly altered compared to the “full” simulation. From 3.5–4 dpf, both MC and PQ length under  
310 isotropic growth exhibited marked undergrowth as seen in Figure 7B. No change was observed from  
311 4–4.5 dpf, while MC depth slightly undergrew from 4.5–5 dpf as shown in Figure 7B. From 5–5.5  
312 dpf, MC and PQ both length and depth were markedly undergrown as shown in Figure 7B. The time  
313 windows most severely impacted by the removal of growth orientation (from 3.5–4 and 5–5.5 dpf)

314 were also the windows that exhibited the most complex growth patterns with pronounced growth  
315 anisotropy (see Table 2 and Figure 4). Growth predictions for the four time-windows and both  
316 adjusted simulation types are provided in Supplementary Figures 3 and 4. These results indicate that  
317 growth orientation, and the cellular dynamics likely responsible for it, such as cell orientation and  
318 oriented cell division, are crucial to correct morphogenesis. Taken together, our findings suggest that  
319 whereas cell proliferation, intercalation and ECM deposition minorly impacted zebrafish jaw joint  
320 growth, cell volume expansion and orientation dominate joint growth and morphogenesis.

321

## 322 Discussion

323 In this research, local tissue deformations of larval zebrafish jaw joints were quantified based upon  
324 tracked cell-level data and simulated in a predictive model of joint growth. Our model, the first to  
325 simulate joint growth based on biofidelic data, was used to unravel dominant influences and identify  
326 which cellular behaviours dominate growth and morphogenesis in the developing zebrafish jaw joint.

327 Our analysis of zebrafish jaw joint cell dynamics revealed spatially and temporally heterogeneous  
328 growth patterns. Growth rates and orientations evolved over the time period studied and elevated  
329 growth rates were evident at the retroarticular process of the Meckel's cartilage, which is known to  
330 project ventro-posteriorly from the jaw joint during larval development (Eames et al. 2013). In other  
331 developing tissues, such as the developing chick limb bud (Morishita et al. 2015, Suzuki and Morishita  
332 2017) and the drosophila wing disc (Tozluoglu et al. 2019), spatial and temporal growth  
333 heterogeneity was shown to be a key driver of morphogenesis, and in simulations, uniform growth  
334 rates did not lead to correct shape predictions (Tozluoglu et al. 2019). In contrast to the limb bud and  
335 wing disc, our data indicate that spatial growth heterogeneity is not a dominant influence on  
336 zebrafish jaw joint shape for the time windows investigated. Rather, growth orientation was more  
337 important for jaw joint growth and morphogenesis in the timeframe studied. Our analysis of  
338 zebrafish jaw joint cell dynamics revealed a marked growth anisotropy for the time period studied,  
339 and in simulations, isotropic growth led to pronounced shape alterations. This observation is in line  
340 with Boehm et al.'s work (2010) in which a parameter optimisation approach on murine limb bud  
341 development revealed that growth orientation was critical for accurate shape prediction. Altered cell  
342 orientation and increased cell sphericity has been shown to be correlated with altered zebrafish jaw  
343 shapes which could indicate a link between cell orientation and growth orientation (Brunt et al. 2015,  
344 Brunt et al. 2016, Lawrence et al. 2018).

345 Our quantification of cell dynamics was derived from cell rearrangements, cell volume expansion and  
346 extracellular matrix (ECM) deposition, demonstrating that joint growth and morphogenesis can be  
347 reasonably approximated based on these behaviours. Analysis of cell numbers indicated that  
348 proliferation is unlikely to be a dominant influence in the joint over the timeframe examined, despite  
349 the fact that proliferation has been highlighted in the more mature regions of the developing  
350 cartilage elements and in the interzone (Kimmel et al. 1998, Brunt et al. 2017). We also propose that  
351 cell intercalation is not likely to have a very strong influence on jaw joint growth in the timeframe  
352 and region examined, while acknowledging that cell stacking and convergent extension are key  
353 features of more mature regions of the developing cartilage elements (Kimmel et al. 1998, Shwartz et  
354 al. 2012, Eames et al. 2013, Mork and Crump 2015, Brunt et al. 2016). As previously reported

355 (Kimmel et al. 1998, Brunt et al. 2016, Brunt et al. 2017), we found that cell volume expansion is  
356 likely a key contributor to joint growth, while we found no evidence of substantial increases in ECM  
357 volume over the timeframe under investigation. This corroborates the findings of a recent study  
358 conducted on the juvenile zebrafish pharyngeal skeleton where ECM volume increase was found to  
359 be negligible (Heubel et al. 2021).

360 Some failures in shape predictions were observed in our results. Cell contraction in the hypertrophic  
361 regions of the Meckel's cartilage has not been accurately simulated due to the specific cell  
362 arrangements; in the Meckel's cartilage, cells stack into a single column in the antero-posterior axis.  
363 Because the algorithm for growth quantification does not directly account for cell shape, a medio-  
364 lateral contraction of cells in such a columnar arrangement cannot be captured. In addition, under-  
365 or over-growth of the Meckel's cartilage and the palatoquadrate length and depth was observed in  
366 some of the timeframes of interest. These imprecisions arise from the small number of cells in the  
367 zebrafish jaw. An advantage of our modelling approach will enable it to be applied to organisms with  
368 increased numbers of cells and overcome deficiencies resulting from low cell numbers. Because our  
369 model focusses on macro-scale shape changes and does not simulate individual cell behaviours, its  
370 computational simplicity and practicability enable its use with larger animal models, while cell-based  
371 models, such as vertex models in which each cell is represented by a polygon (Alt et al. 2017), are  
372 constrained to a limited number of cells.

373 Our method as presented here is optimal for specimens in which live imaging can be performed. A  
374 straightforward application is to quantify growth patterns in epithelial tissues using high cellular  
375 resolution images obtained through fluorescence microscopy combined with automated tools for cell  
376 segmentation and tracking like EpiTools (Heller et al. 2016). Modelling axolotl joint growth using our  
377 approach is also feasible. The axolotl is often used as a model for limb development (Nye et al. 2003,  
378 Hutchison et al. 2007) and progress has been made in visualising cells at high resolution during live  
379 imaging (Masselink and Tanaka 2021). The existence of rainbow transgenic lines also facilitates cell  
380 tracking and visualisation and was used in the past to study digit tip regeneration (Currie et al. 2016).  
381 Though live imaging is optimal, it may not be critical to track individual cells with larger numbers of  
382 cells. Comparisons between local tissue geometry at successive timepoints may be sufficient to  
383 predict joint growth and morphogenesis, which we are exploring in ongoing work.

384 In conclusion, our findings show that cell volume expansion and orientation are key drivers of larval  
385 zebrafish jaw joint growth and morphogenesis. These new insights on what drives joint growth and  
386 morphogenesis was facilitated through growth predictions based upon precise and specific cell-level  
387 characterisation of growth. Gaining a better understanding of the cell-level processes and dynamics

388 of joint morphogenesis opens up new avenues towards understanding the aetiology of congenital  
389 conditions such as developmental dysplasia of the hip and arthrogyposis.

## 390 Acknowledgements

391 This research was funded by an Anatomical Society PhD studentship to J.G.. C.L.H. was funded by  
392 Versus Arthritis Fellowship 29137. E.L. was funded by a Wellcome Trust Dynamic Cell PhD  
393 studentship. M.W. was funded by the China Scholarship Council. We thank James Monsen for  
394 providing the methodology and MATLAB script which was used for generating average shapes. We  
395 would like to thank Mat Green for zebrafish husbandry and the staff of the Wolfson Bioimaging  
396 centre Bristol for imaging support.

## 397 Author contributions

398 Conceptualisation: J.G., C.L.H., N.C.N.; Methodology: J.G., E.A.L., M.W., C.L.H., N.C.N.; Software: J.G.;  
399 Analysis and visualisation: J.G., C.L.H., N.C.N.; Supervision: C.L.H., N.C.N.; Writing – original draft: J.G.,  
400 N.C.N.; Writing – review & editing: J.G., E.A.L., M.W., C.L.H., N.C.N.; Funding acquisition: C.L.H.,  
401 N.C.N.

## 402 Supplementary information

403 Data underlying this article can be accessed on zenodo at doi: 10.5281/zenodo.5769854.

## 413 References

- 414 Alestrom, P., L. D'Angelo, P. J. Midtlyng, et al. (2020). "Zebrafish: Housing and husbandry  
415 recommendations." Lab Anim **54**(3): 213-224.
- 416 Alt, S., P. Ganguly and G. Salbreux (2017). "Vertex models: from cell mechanics to tissue  
417 morphogenesis." Philos Trans R Soc Lond B Biol Sci **372**(1720).
- 418 Boehm, B., H. Westerberg, G. Lesnicar-Pucko, et al. (2010). "The role of spatially controlled cell  
419 proliferation in limb bud morphogenesis." PLoS Biol **8**(7): e1000420.
- 420 Brunt, L. H., K. Begg, E. Kague, S. Cross and C. L. Hammond (2017). "Wnt signalling controls the  
421 response to mechanical loading during zebrafish joint development." Development **144**(15): 2798-  
422 2809.



- 423 Brunt, L. H., J. L. Norton, J. A. Bright, E. J. Rayfield and C. L. Hammond (2015). "Finite element  
424 modelling predicts changes in joint shape and cell behaviour due to loss of muscle strain in jaw  
425 development." J Biomech **48**(12): 3112-3122.
- 426 Brunt, L. H., K. A. Roddy, E. J. Rayfield and C. L. Hammond (2016). "Building Finite Element Models to  
427 Investigate Zebrafish Jaw Biomechanics." J Vis Exp(118).
- 428 Brunt, L. H., R. E. Skinner, K. A. Roddy, et al. (2016). "Differential effects of altered patterns of  
429 movement and strain on joint cell behaviour and skeletal morphogenesis." Osteoarthritis Cartilage  
430 **24**(11): 1940-1950.
- 431 Carney, T. J., K. A. Dutton, E. Greenhill, et al. (2006). "A direct role for Sox10 in specification of neural  
432 crest-derived sensory neurons." Development **133**(23): 4619-4630.
- 433 Chijimatsu, R. and T. Saito (2019). "Mechanisms of synovial joint and articular cartilage  
434 development." Cell Mol Life Sci **76**(20): 3939-3952.
- 435 Currie, J. D., A. Kawaguchi, R. M. Traspas, et al. (2016). "Live Imaging of Axolotl Digit Regeneration  
436 Reveals Spatiotemporal Choreography of Diverse Connective Tissue Progenitor Pools." Dev Cell **39**(4):  
437 411-423.
- 438 Decker, R. S., H. B. Um, N. A. Dymant, et al. (2017). "Cell origin, volume and arrangement are drivers  
439 of articular cartilage formation, morphogenesis and response to injury in mouse limbs." Dev Biol  
440 **426**(1): 56-68.
- 441 Dixit, N. N., D. C. McFarland, M. B. Fisher, J. H. Cole and K. R. Saul (2020). "Integrated iterative  
442 musculoskeletal modeling predicts bone morphology following brachial plexus birth injury (BPBI)." J  
443 Biomech **103**: 109658.
- 444 Eames, B. F., A. DeLaurier, B. Ullmann, et al. (2013). "FishFace: interactive atlas of zebrafish  
445 craniofacial development at cellular resolution." BMC Dev Biol **13**: 23.
- 446 Faber, B. G., M. Frysz and J. H. Tobias (2020). "Unpicking observational relationships between hip  
447 shape and osteoarthritis: hype or hope?" Curr Opin Rheumatol **32**(1): 110-118.
- 448 Giorgi, M., A. Carriero, S. J. Shefelbine and N. C. Nowlan (2014). "Mechanobiological simulations of  
449 prenatal joint morphogenesis." J Biomech **47**(5): 989-995.

- 450 Giorgi, M., A. Carriero, S. J. Shefelbine and N. C. Nowlan (2015). "Effects of normal and abnormal  
451 loading conditions on morphogenesis of the prenatal hip joint: application to hip dysplasia." J  
452 Biomech **48**(12): 3390-3397.
- 453 Graner, F., B. Dollet, C. Raufaste and P. Marmottant (2008). "Discrete rearranging disordered  
454 patterns, part I: robust statistical tools in two or three dimensions." Eur Phys J E Soft Matter **25**(4):  
455 349-369.
- 456 Heegaard, J. H., G. S. Beaupre and D. R. Carter (1999). "Mechanically modulated cartilage growth may  
457 regulate joint surface morphogenesis." J Orthop Res **17**(4): 509-517.
- 458 Heller, D., A. Hoppe, S. Restrepo, et al. (2016). "EpiTools: An Open-Source Image Analysis Toolkit for  
459 Quantifying Epithelial Growth Dynamics." Dev Cell **36**(1): 103-116.
- 460 Heubel, B. P., C. A. Bredesen, T. F. Schilling and P. Le Pabic (2021). "Endochondral growth zone  
461 pattern and activity in the zebrafish pharyngeal skeleton." Dev Dyn **250**(1): 74-87.
- 462 Hutchison, C., M. Pilote and S. Roy (2007). "The axolotl limb: a model for bone development,  
463 regeneration and fracture healing." Bone **40**(1): 45-56.
- 464 Kahn, J., Y. Shwartz, E. Blitz, et al. (2009). "Muscle contraction is necessary to maintain joint  
465 progenitor cell fate." Dev Cell **16**(5): 734-743.
- 466 Kimmel, C. B., C. T. Miller, G. Kruse, et al. (1998). "The shaping of pharyngeal cartilages during early  
467 development of the zebrafish." Dev Biol **203**(2): 245-263.
- 468 Lawrence, E. A., J. Aggleton, J. van Loon, et al. (2021). "Exposure to hypergravity during zebrafish  
469 development alters cartilage material properties and strain distribution." Bone Joint Res **10**(2): 137-  
470 148.
- 471 Lawrence, E. A., E. Kague, J. A. Aggleton, et al. (2018). "The mechanical impact of col11a2 loss on  
472 joints; col11a2 mutant zebrafish show changes to joint development and function, which leads to  
473 early-onset osteoarthritis." Philos Trans R Soc Lond B Biol Sci **373**(1759).
- 474 Legland, D., I. Arganda-Carreras and P. Andrey (2016). "MorphoLibJ: integrated library and plugins for  
475 mathematical morphology with ImageJ." Bioinformatics **32**(22): 3532-3534.
- 476 Marcon, L., C. G. Arques, M. S. Torres and J. Sharpe (2011). "A computational clonal analysis of the  
477 developing mouse limb bud." PLoS Comput Biol **7**(2): e1001071.

- 478 Masselink, W. and E. M. Tanaka (2021). "Toward whole tissue imaging of axolotl regeneration." Dev  
479 Dyn **250**(6): 800-806.
- 480 Mitchell, R. E., L. F. Huitema, R. E. Skinner, et al. (2013). "New tools for studying osteoarthritis  
481 genetics in zebrafish." Osteoarthritis Cartilage **21**(2): 269-278.
- 482 Morishita, Y., A. Kuroiwa and T. Suzuki (2015). "Quantitative analysis of tissue deformation dynamics  
483 reveals three characteristic growth modes and globally aligned anisotropic tissue deformation during  
484 chick limb development." Development **142**(9): 1672-1683.
- 485 Mork, L. and G. Crump (2015). "Zebrafish Craniofacial Development: A Window into Early  
486 Patterning." Curr Top Dev Biol **115**: 235-269.
- 487 Nye, H. L., J. A. Cameron, E. A. Chernoff and D. L. Stocum (2003). "Extending the table of stages of  
488 normal development of the axolotl: limb development." Dev Dyn **226**(3): 555-560.
- 489 Ollion, J., J. Cochenec, F. Loll, C. Escude and T. Boudier (2013). "TANGO: a generic tool for high-  
490 throughput 3D image analysis for studying nuclear organization." Bioinformatics **29**(14): 1840-1841.
- 491 Pacifici, M., E. Koyama and M. Iwamoto (2005). "Mechanisms of synovial joint and articular cartilage  
492 formation: recent advances, but many lingering mysteries." Birth Defects Res C Embryo Today **75**(3):  
493 237-248.
- 494 Rubin, S., A. Agrawal, J. Stegmaier, et al. (2021). "Application of 3D MAPs pipeline identifies the  
495 morphological sequence chondrocytes undergo and the regulatory role of GDF5 in this process." Nat  
496 Commun **12**(1): 5363.
- 497 Rux, D., R. S. Decker, E. Koyama and M. Pacifici (2019). "Joints in the appendicular skeleton:  
498 Developmental mechanisms and evolutionary influences." Curr Top Dev Biol **133**: 119-151.
- 499 Sandell, L. J. (2012). "Etiology of osteoarthritis: genetics and synovial joint development." Nat Rev  
500 Rheumatol **8**(2): 77-89.
- 501 Schindelin, J., I. Arganda-Carreras, E. Frise, et al. (2012). "Fiji: an open-source platform for biological-  
502 image analysis." Nat Methods **9**(7): 676-682.
- 503 Shefelbine, S. J. and D. R. Carter (2004). "Mechanobiological predictions of growth front morphology  
504 in developmental hip dysplasia." J Orthop Res **22**(2): 346-352.

- 505 Shwartz, Y., Z. Farkas, T. Stern, A. Aszodi and E. Zelzer (2012). "Muscle contraction controls skeletal  
506 morphogenesis through regulation of chondrocyte convergent extension." Dev Biol **370**(1): 154-163.
- 507 Shwartz, Y., S. Viukov, S. Krief and E. Zelzer (2016). "Joint Development Involves a Continuous Influx  
508 of Gdf5-Positive Cells." Cell Rep **15**(12): 2577-2587.
- 509 Stern, T. S., S. J., S. Y. Shvartsman and E. F. Wieschaus (2021). "Deconstructing Gastrulation at the  
510 single cell level." bioRxiv preprint.
- 511 Suzuki, T. and Y. Morishita (2017). "A quantitative approach to understanding vertebrate limb  
512 morphogenesis at the macroscopic tissue level." Curr Opin Genet Dev **45**: 108-114.
- 513 Tozluoglu, M., M. Duda, N. J. Kirkland, et al. (2019). "Planar Differential Growth Rates Initiate Precise  
514 Fold Positions in Complex Epithelia." Dev Cell **51**(3): 299-312 e294.
- 515 Yang, Y. (2013). Skeletal Morphogenesis and Embryonic Development. Primer on the Metabolic Bone  
516 Diseases and Disorders of Mineral Metabolism. I. John Wiley & Sons. American Society for Bone and  
517 Mineral Research.
- 518 Zhang, Y., K. Annusver, K. Sunadome, et al. (2020). "Epiphyseal Cartilage Formation Involves  
519 Differential Dynamics of Various Cellular Populations During Embryogenesis." Front Cell Dev Biol **8**:  
520 122.
- 521

## 522 Tables

523 Table 1: Filters applied to larval zebrafish jaw joint image stacks before cell segmentation

| Filters                  | Parameters                                                                 |
|--------------------------|----------------------------------------------------------------------------|
| 3D Fast Filters-OpenGray | Isotropic radius: 2 pixels                                                 |
| 3D Edge and Symmetry     | Canny: 0.6                                                                 |
| 3D Morphological Filter  | Operation: closing<br>Element shape: diamond<br>Isotropic radius: 2 pixels |

524

525 Table 2: Mean growth rates per hour ( $\times 10^{-2}$ ) along the three orthogonal directions for growth for  
526 each time window (days post fertilization (dpf) 3.5–4, 4–4.5, 4.5–5 and 5–5.5) in the anterior  
527 Meckel’s cartilage (MC) and posterior Palatoquadrate (PQ) joint elements.

|                                       |                         | <i>3.5–4 dpf</i> | <i>4–4.5 dpf</i> | <i>4.5–5 dpf</i> | <i>5–5.5 dpf</i> |
|---------------------------------------|-------------------------|------------------|------------------|------------------|------------------|
| <b>Anterior MC<br/>joint element</b>  | <i>Main direction</i>   | $-2.06 \pm 1.49$ | $1.38 \pm 0.67$  | $2.45 \pm 0.61$  | $1.83 \pm 0.48$  |
|                                       | <i>Second direction</i> | $1.20 \pm 1.07$  | $0.39 \pm 0.52$  | $0.50 \pm 0.37$  | $0.26 \pm 0.45$  |
|                                       | <i>Third direction</i>  | $0.44 \pm 0.47$  | $0.031 \pm 0.24$ | $0.09 \pm 0.29$  | $0.10 \pm 0.17$  |
| <b>Posterior PQ<br/>joint element</b> | <i>Main direction</i>   | $1.01 \pm 3.51$  | $1.53 \pm 2.16$  | $1.62 \pm 1.62$  | $2.10 \pm 1.27$  |
|                                       | <i>Second direction</i> | $0.54 \pm 0.68$  | $0.26 \pm 0.60$  | $0.42 \pm 0.93$  | $-0.46 \pm 0.94$ |
|                                       | <i>Third direction</i>  | $0.06 \pm 2.23$  | $-0.07 \pm 1.41$ | $0.09 \pm 0.43$  | $0.07 \pm 0.26$  |

528

## 529 Figure legends

530 Figure 1: **Growth map calculations in larval zebrafish jaw joint.** A) Maximum projection of ventral  
531 confocal image stacks of the jaw from a larval zebrafish aged 5 dpf expressing  
532 *Tg(Col2a1aBAC:mcherry)* cartilage marker; red box shows the jaw joint for which morphogenesis is  
533 characterised in this study; B) A grid marks out the regions (ROIs) of the anterior MC and posterior  
534 PQ joint elements in which growth is characterised. Each cube side length is 15 $\mu$ m. C) i) The growth  
535 rate calculated for each ROI is represented by an ellipsoid with orthogonal axes. ii) The ellipsoid's  
536 radii and the orientation of its axes are used to generate a growth map for each of the ellipsoid's  
537 radii in the lateral plane; growth rate is represented by the square's colour while the direction of  
538 growth is shown by solid black lines in the corresponding square. MC: Meckel's cartilage, PQ:  
539 Palatoquadrate, CH: ceratohyal, RAP: retroarticular process, A: Anterior, P: Posterior, L: Lateral, M:  
540 Medial, D: Dorsal, V: Ventral.

541

542 Figure 2: **Integration of the growth maps in a finite element model.** A) The first step in constructing  
543 our FE model is to obtain an average geometry for each timepoint (3.5, 4, 4.5, 5 and 5.5 dpf). For  
544 each timepoint, half jaw shapes are aligned and sliced transversally (i). For each slice, the shape  
545 outlines of each sample (four here) are obtained (ii) then averaged (iii). The slide marked in red in (i)  
546 is shown as an example in (ii) and (iii). B) i) An FE model is generated based on the averaged shape  
547 outlines; the joint interzone is added and the areas marked with dashed triangles are constrained in  
548 the specified dimensions (e.g., x). ii) Section of the joint in the lateral plane showing the growth fields  
549 which are applied to the model along with their associated directions. The view is marked by a red  
550 box in (i). MC: Meckel's cartilage, PQ: Palatoquadrate, CH: ceratohyal, A: Anterior, P: Posterior, L:  
551 Lateral, M: Medial, D: Dorsal, V: Ventral.

552

553 Figure 3: **Shape changes between 3.5 and 5.5 dpf in zebrafish jaws.** Superimposed 3.5 (purple) and  
554 5.5 (turquoise) dpf 3D average shapes and 3.5 to 5.5 dpf average shape outlines in the ventral and  
555 lateral planes. The shape features which are observed to change as the jaw develops are marked  
556 with specific symbols (diamond: MC length, square: MC width, circle: MC depth, triangle: PQ length,  
557 semi-circle: PQ depth). MC: Meckel's cartilage, PQ: palatoquadrate, A: Anterior, P: Posterior, L:  
558 Lateral, M: Medial, D: Dorsal, V: Ventral.

559

560 **Figure 4: Growth rates from 3.5 to 5.5 dpf in zebrafish jaw joint exhibits spatial and temporal**  
561 **patterns.** Maps showing growth rates along the main direction for growth (major axis of the  
562 ellipsoid) and their associated directions for each time window (3.5—4, 4—4.5, 4.5—5 and 5—5.5) in  
563 the anterior Meckel’s cartilage (A) and posterior Palatoquadrate (B) joint elements in the lateral  
564 plane. Growth rates are represented by colours while the direction is shown by solid black lines.  
565 Results are displayed across the rudiment’s width; views in the ventral plane of each section are  
566 displayed on the left panels. Black arrows in (A) show areas of elevated growth rates.

567

568 **Figure 5: Cell intercalation and the extracellular matrix minorly contribute to jaw joint shaping.**  
569 Representative ventral stack of the anterior jaw joint element of a live specimen aged 4.5 and 5 dpf  
570 expressing the transgenic reporters *Col2a1aBAC:mcherry* and *-4.9sox10:eGFP* marking cartilage. No  
571 observation of cell intercalation is made with the cells being clearly identified over time (three cells  
572 marked by arrows as examples). The volume occupied by the interstitial space is minor compared to  
573 the volume occupied by cells.

574

575 **Figure 6: The integration of cell-based data in an FE model successfully predicts zebrafish jaw shape**  
576 **changes from 3.5 to 5.5 dpf, with most faithful predictions from 4 to 4.5 pf.** The shape outlines for  
577 each time window are superimposed (blue: initial shape, green: target shape, orange: predicted  
578 shape) and the shapes features introduced in figure 3 are compared (triangle: Palatoquadrate (PQ)  
579 length, diamond: Meckel’s cartilage (MC) length, square: MC width, semi-circle: PQ depth, circle: MC  
580 depth) and rated with a colour code explained in the bottom panel (red means no growth predicted,  
581 yellow means undergrowth though the pattern of change is correct, green means accurate shape  
582 changes and violet means overgrowth though the pattern of change is correct). A: Anterior, P:  
583 Posterior, L: Lateral, M: Medial, D: Dorsal, V: Ventral.

584

585 **Figure 7: Growth orientation plays an important role in jaw joint shaping whereas growth**  
586 **heterogeneity minorly impacts zebrafish jaw shape predictions.** Growth predictions obtained from  
587 homogeneous anisotropic (A) and heterogeneous isotropic (B) growth fields are compared with the  
588 “full” simulation (heterogeneous anisotropic). Only the views where shape changes were observed in  
589 either the homogeneous anisotropic or the heterogeneous isotropic shape predictions are displayed.  
590 The shape outlines in all views and time windows are displayed in Supplementary Figures 3 and 4.  
591 The black symbols denote the shape features which have been altered when either growth

- 592 heterogeneity or orientation have been removed (triangle: Palatoquadrate (PQ) length, diamond:  
593 Meckel's cartilage (MC) length, square: MC width, semi-circle: PQ depth, circle: MC depth).



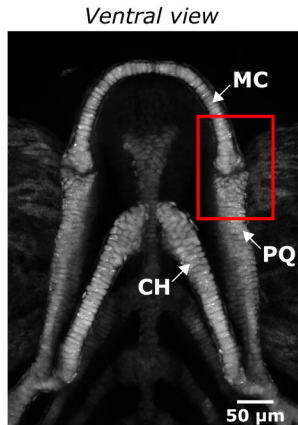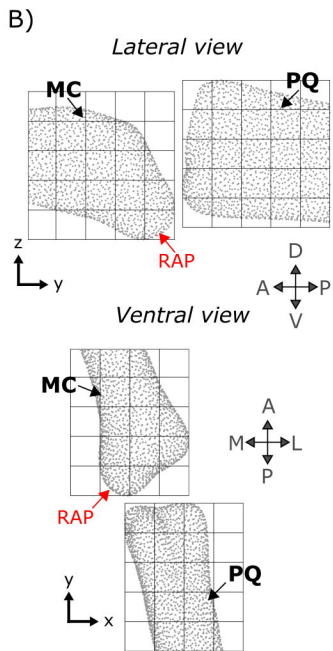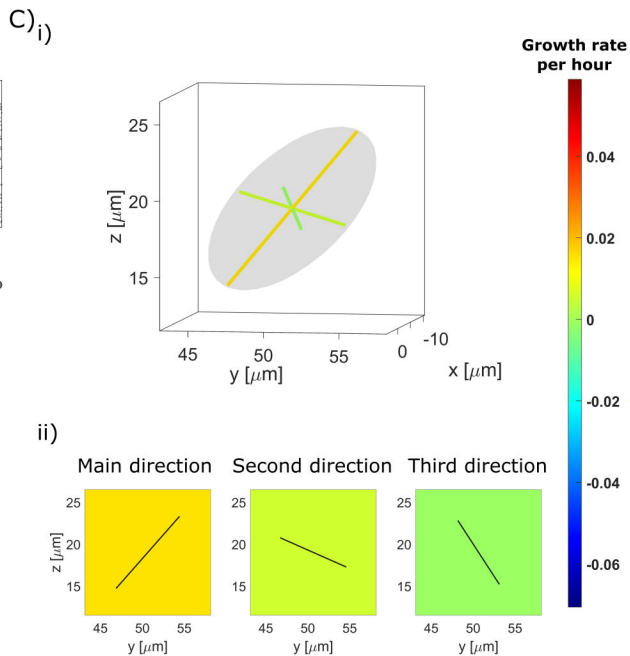

A) i)

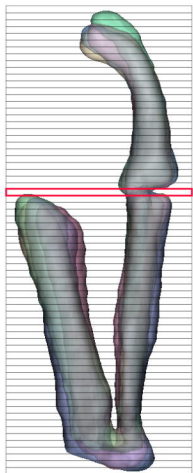

ii)

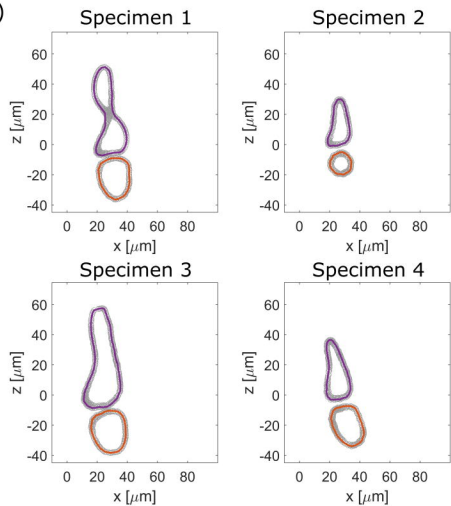

iii)

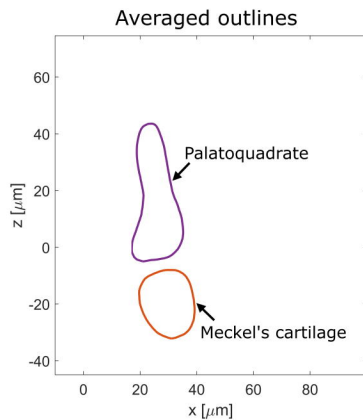

B) i)

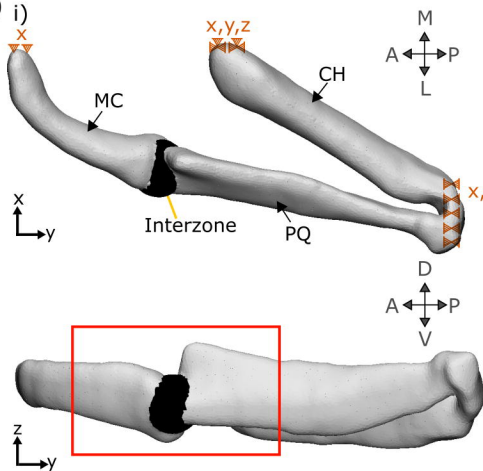

ii)

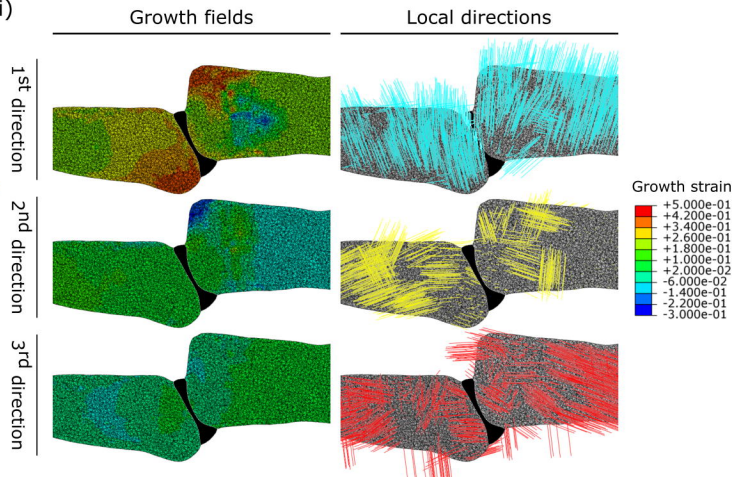

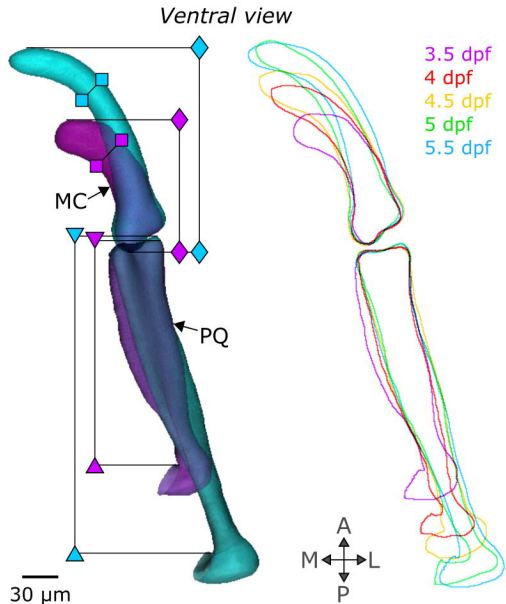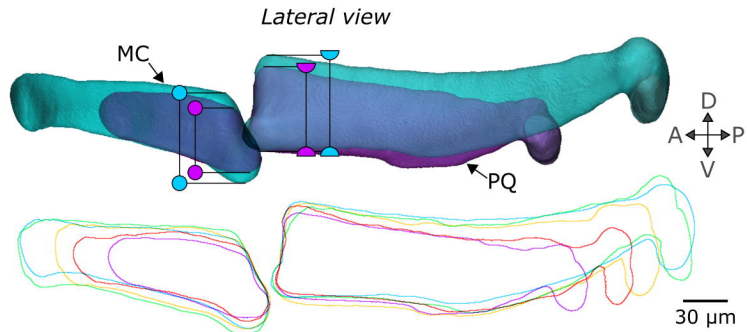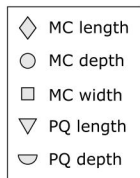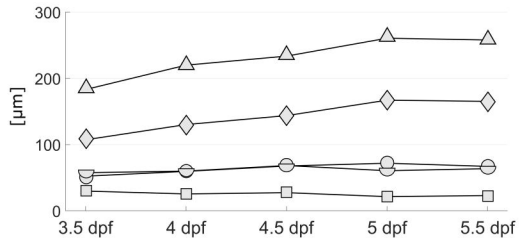

A)

## Meckel's cartilage joint element

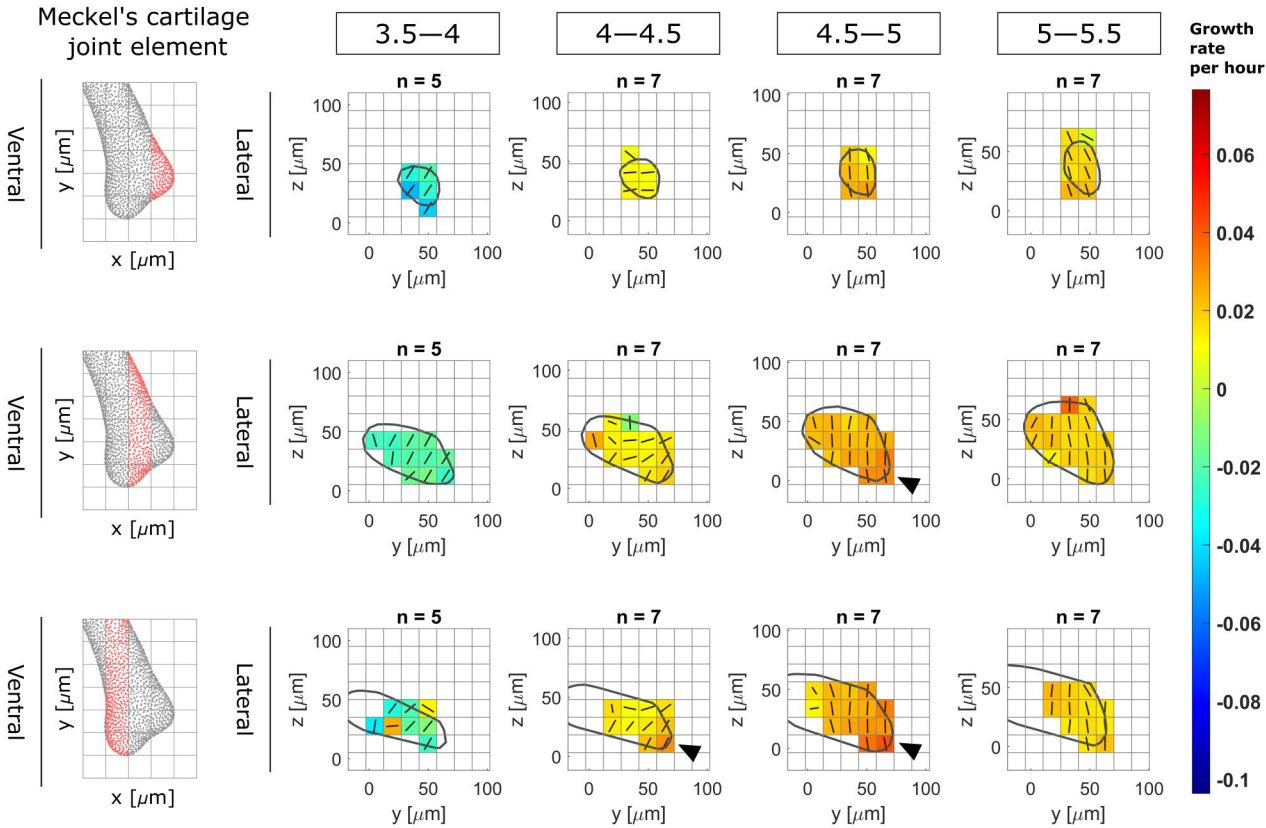

B)

## Palatoquadrate joint element

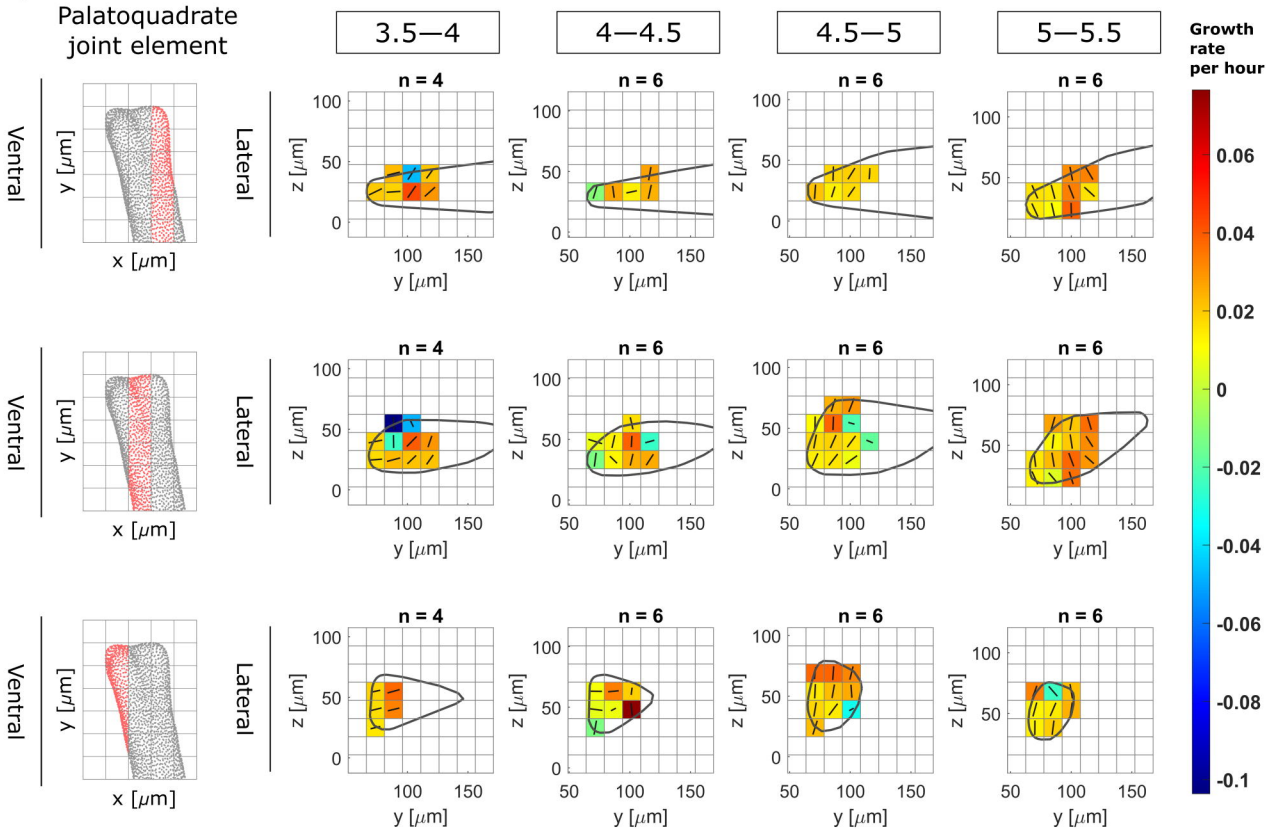

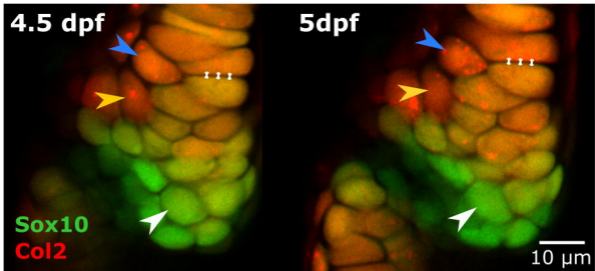

➤ Cell position    ··· Interstitial space

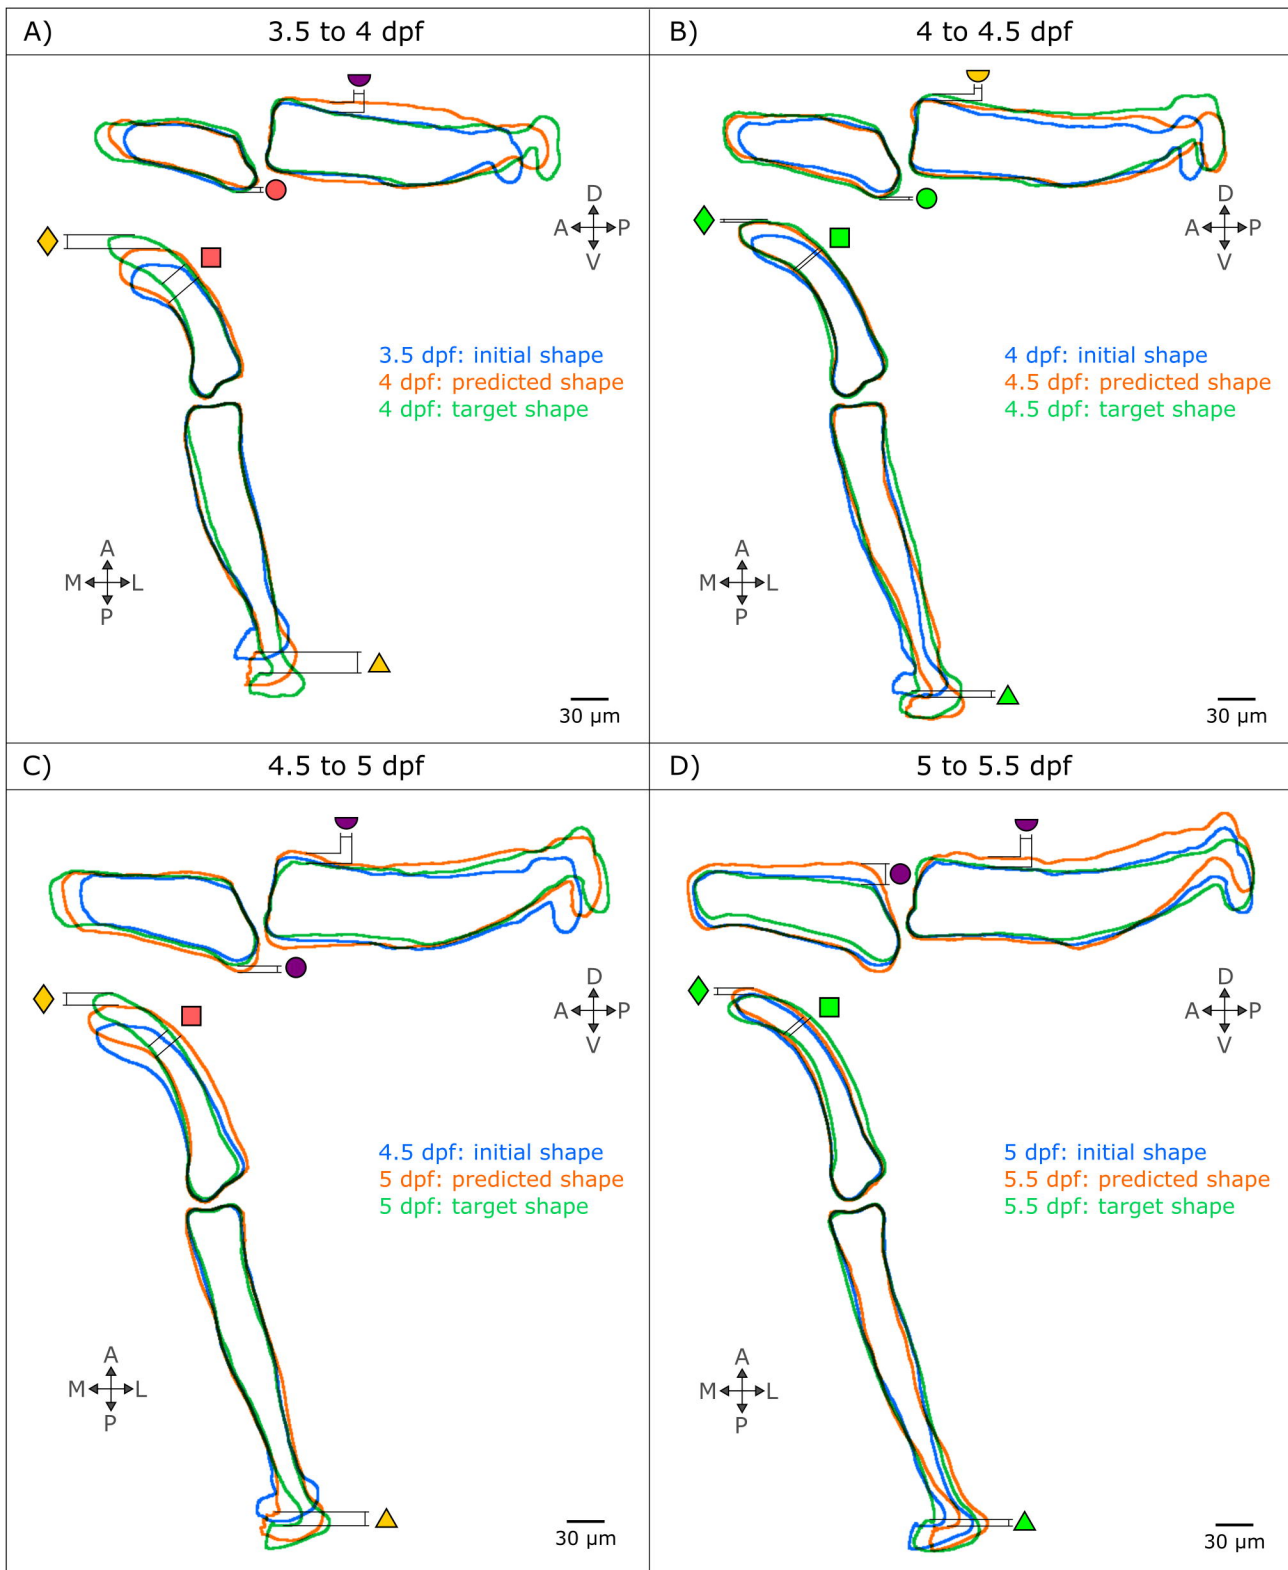

Shape changes match:      No growth predicted      Undergrowth      Accurate growth      Overgrowth

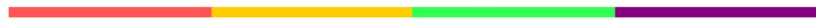

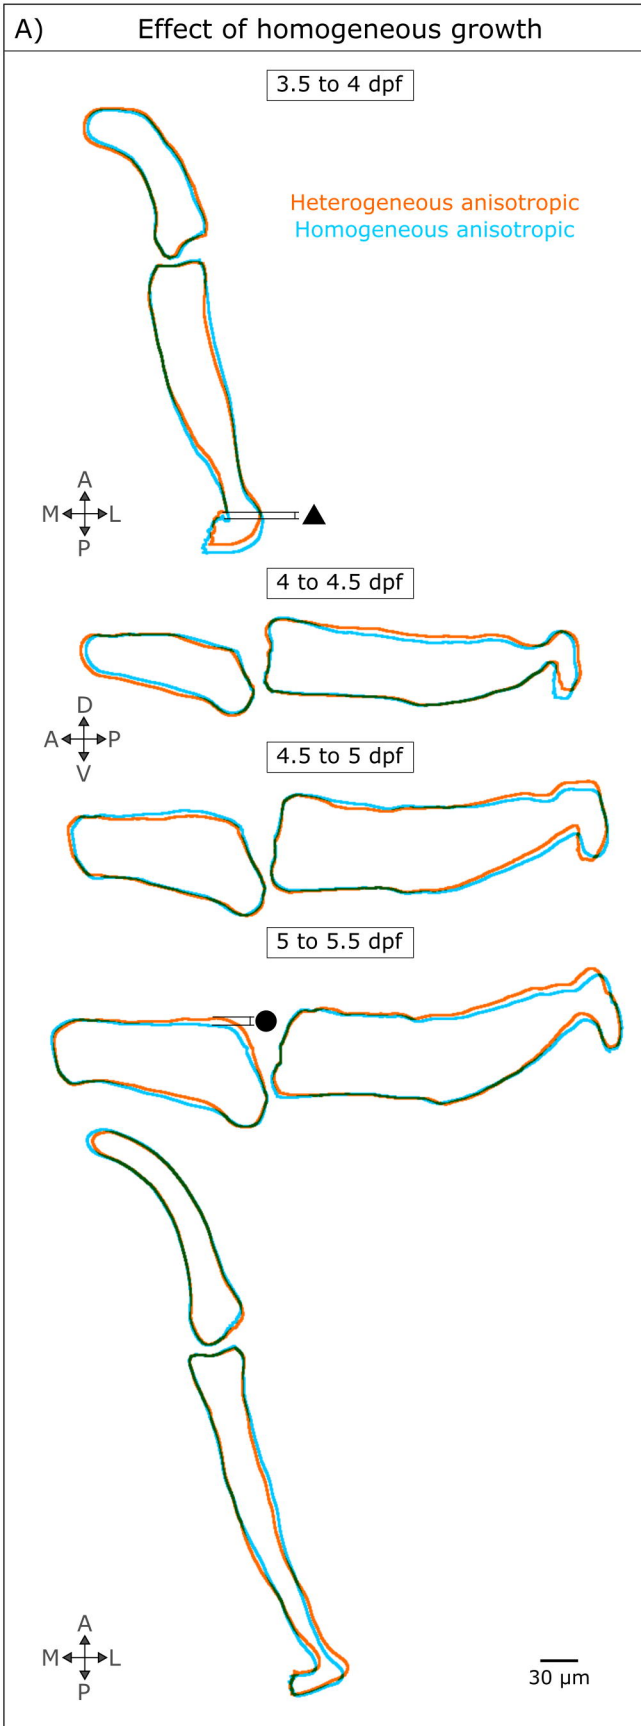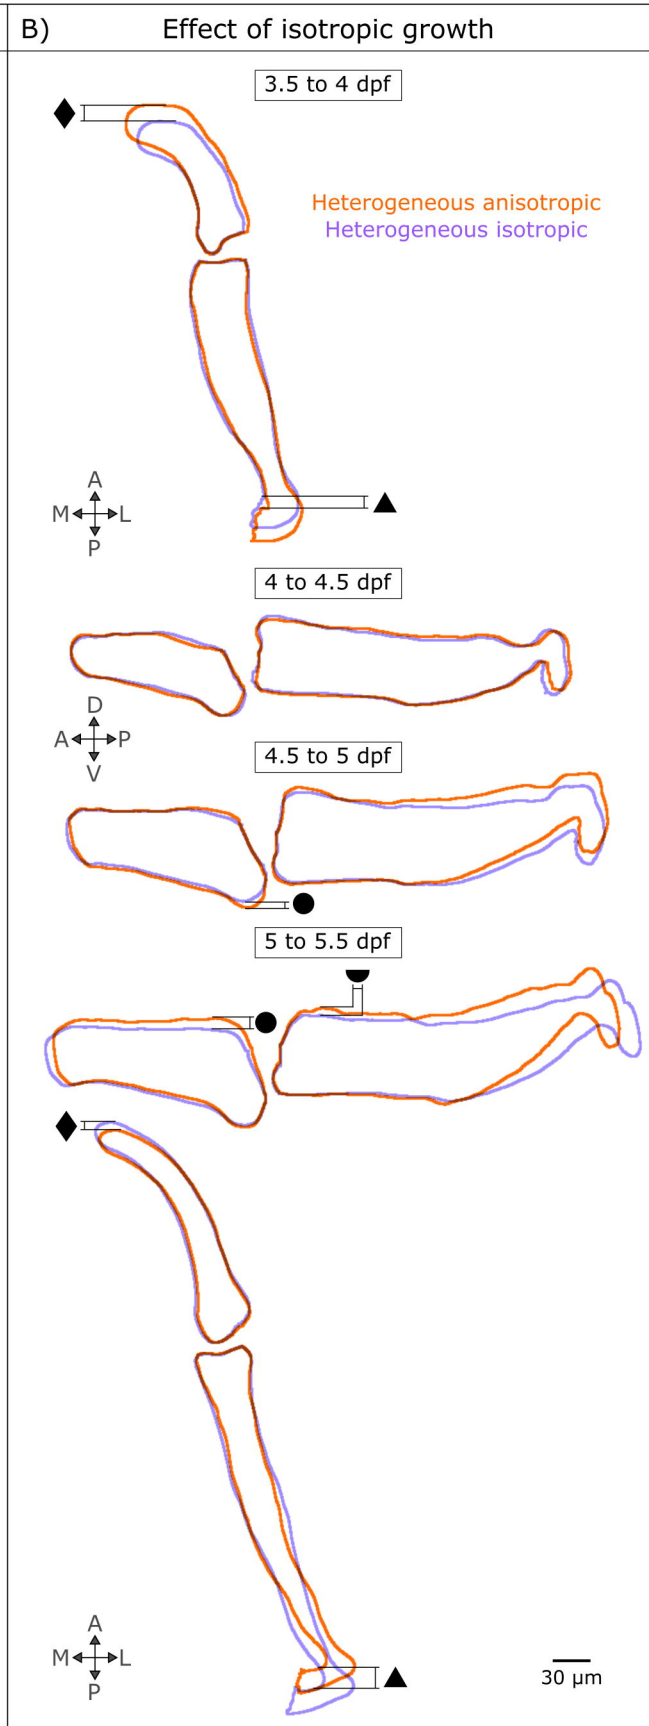

Source: http://biorxiv.org/content/10.1101/2022.01.13.476166v1.full.pdf
